# Supplementary material for: Synthesis and structural and spectroscopic properties of a cyanido-bridged mixed-valence compound [Fe–NC–Ru–CN–Fe]
Source: Royal Society of Chemistry journal article supplement (doi:10.1039/d3nj00049d), 2023-01-01
Supplement: d3nj00049d1.pdf [file d3nj00049d1.pdf]

# Synthesis, Structural and Spectroscopic Properties of Cyanido-bridged Mixed-valence Compound [Fe-NC-Ru-CN- Fe]

Ming Liu<sup>a</sup>, Yan Xiong<sup>a</sup>, Weixiu Xu<sup>a</sup>, Yong Wang<sup>a\*</sup>

<sup>a</sup> Hubei Key Laboratory of Drug Synthesis and Optimization, College of Chemical Engineering  
 and Pharmacy, Jingchu University of Technology, Jinmen, 444800, Hubei, P. R. China

Email: [wangyong1987@jcut.edu.cn](mailto:wangyong1987@jcut.edu.cn)

**Table S1.** Crystallographic Data and Details of Structure Determination for Compounds **1**, **2**, **4**,  
*trans*-Ru<sup>II</sup>(Meopy)<sub>4</sub>(CN)<sub>2</sub> and [CpFe<sup>III</sup>(dppe)Br](PF<sub>6</sub>)

| Compound                                   | <b>1</b> ·7H <sub>2</sub> O                                                                                        | <b>2</b> (2·CH <sub>3</sub> CN·0.5NH <sub>4</sub> PF <sub>6</sub> )                                                  | <b>4</b>                                                                                                           | <i>trans</i> -Ru <sup>II</sup> (Meopy) <sub>4</sub> (CN) <sub>2</sub> | [CpFe <sup>III</sup> (dppe)Br](PF <sub>6</sub> )                  |
|--------------------------------------------|--------------------------------------------------------------------------------------------------------------------|----------------------------------------------------------------------------------------------------------------------|--------------------------------------------------------------------------------------------------------------------|-----------------------------------------------------------------------|-------------------------------------------------------------------|
| CCDC                                       | 2233237                                                                                                            | 2233238                                                                                                              | 2233234                                                                                                            | 2233235                                                               | 2233236                                                           |
| Chemical formula                           | C <sub>84</sub> H <sub>92</sub> F <sub>12</sub> Fe <sub>2</sub> N <sub>6</sub> O <sub>7</sub><br>P <sub>6</sub> Ru | C <sub>172</sub> H <sub>166</sub> F <sub>42</sub> Fe <sub>4</sub> N <sub>15</sub> P <sub>15</sub><br>Ru <sub>2</sub> | C <sub>88</sub> H <sub>86</sub> F <sub>12</sub> Fe <sub>2</sub> N <sub>6</sub><br>O <sub>4</sub> P <sub>6</sub> Ru | C <sub>26</sub> H <sub>28</sub> N <sub>6</sub> O <sub>4</sub> Ru      | C <sub>31</sub> H <sub>29</sub> BrF <sub>6</sub> FeP <sub>3</sub> |
| Formula weight                             | 1924.22                                                                                                            | 4131.28                                                                                                              | 1918.21                                                                                                            | 589.61                                                                | 744.21                                                            |
| Colour and Habit                           | red prism                                                                                                          | red prism                                                                                                            | red prism                                                                                                          | red prism                                                             | red prism                                                         |
| Crystal Size / mm                          | 0.47×0.33×0.04                                                                                                     | 0.38×0.32×0.12                                                                                                       | 0.20×0.10×0.09                                                                                                     | 0.61×0.13×0.05                                                        | 0.41×0.31×0.18                                                    |
| <i>T</i> / K                               | 293                                                                                                                | 293                                                                                                                  | 293                                                                                                                | 293                                                                   | 293                                                               |
| Crystal system                             | tetragonal                                                                                                         | monoclinic                                                                                                           | triclinic                                                                                                          | triclinic                                                             | monoclinic                                                        |
| Space group                                | <i>P</i> 4/ <i>n</i>                                                                                               | <i>C</i> 2/ <i>c</i>                                                                                                 | <i>P</i> -1                                                                                                        | <i>P</i> -1                                                           | <i>P</i> 2 <sub>1</sub> / <i>n</i>                                |
| <i>a</i> / Å                               | 30.879(4)                                                                                                          | 34.313(9)                                                                                                            | 11.243(16)                                                                                                         | 10.373(3)                                                             | 13.129(5)                                                         |
| <i>b</i> / Å                               | 30.879(4)                                                                                                          | 14.540(4)                                                                                                            | 13.466(17)                                                                                                         | 15.745(4)                                                             | 12.844(4)                                                         |
| <i>c</i> / Å                               | 20.440(4)                                                                                                          | 38.850(11)                                                                                                           | 15.947(19)                                                                                                         | 17.176(5)                                                             | 18.599(6)                                                         |
| <i>α</i> / deg                             | 90                                                                                                                 | 90.00                                                                                                                | 90.274(9)                                                                                                          | 96.368(2)                                                             | 90.00                                                             |
| <i>β</i> / deg                             | 90                                                                                                                 | 110.278(5)                                                                                                           | 107.892(14)                                                                                                        | 105.641(4)                                                            | 96.680(5)                                                         |
| <i>γ</i> / deg                             | 90                                                                                                                 | 90.00                                                                                                                | 111.689(9)                                                                                                         | 100.922(2)                                                            | 90.00                                                             |
| <i>V</i> / Å <sup>3</sup>                  | 19490(6)                                                                                                           | 18182(8)                                                                                                             | 2116(5)                                                                                                            | 2613.3(12)                                                            | 3114.9(18)                                                        |
| <i>Z</i>                                   | 8                                                                                                                  | 4                                                                                                                    | 1                                                                                                                  | 4                                                                     | 4                                                                 |
| $\rho_{\text{calcd}}$ (g/cm <sup>3</sup> ) | 1.312                                                                                                              | 1.509                                                                                                                | 1.505                                                                                                              | 1.499                                                                 | 1.587                                                             |
| $\lambda$ (Mo K $\alpha$ , Å)              | 0.71073                                                                                                            | 0.71073                                                                                                              | 0.71073                                                                                                            | 0.71073                                                               | 0.71073                                                           |
| $\mu$ (Mo K $\alpha$ , mm <sup>-1</sup> )  | 0.618                                                                                                              | 0.702                                                                                                                | 0.709                                                                                                              | 0.643                                                                 | 1.978                                                             |
| Completeness                               | 99.8%                                                                                                              | 99.7%                                                                                                                | 98.8%                                                                                                              | 99.0%                                                                 | 99.4%                                                             |
| <i>F</i> (000)                             | 7904                                                                                                               | 8392                                                                                                                 | 982                                                                                                                | 1208                                                                  | 1500                                                              |

|                                         |                                                                        |                                                                        |                                                                        |                                                                        |                                                                       |
|-----------------------------------------|------------------------------------------------------------------------|------------------------------------------------------------------------|------------------------------------------------------------------------|------------------------------------------------------------------------|-----------------------------------------------------------------------|
| $h, k, l$ , range                       | $-36 \leq h \leq 36,$<br>$-36 \leq k \leq 30,$<br>$-24 \leq l \leq 24$ | $-40 \leq h \leq 40,$<br>$-17 \leq k \leq 12,$<br>$-46 \leq l \leq 46$ | $-14 \leq h \leq 14,$<br>$-17 \leq k \leq 17,$<br>$-20 \leq l \leq 20$ | $-13 \leq h \leq 13,$<br>$-20 \leq k \leq 20,$<br>$-22 \leq l \leq 22$ | $16 \leq h \leq 16,$<br>$-15 \leq k \leq 16,$<br>$-24 \leq l \leq 24$ |
| $\theta$ range / deg                    | 2.20-25.00                                                             | 2.11-25.00                                                             | 2.71-27.29                                                             | 2.09-27.50                                                             | 2.56-27.44                                                            |
| $R_{\text{int}}$                        | 0.0765                                                                 | 0.0579                                                                 | 0.0511                                                                 | 0.0355                                                                 | 0.0603                                                                |
| Params/restraints/D<br>ata(obs.)        | 1225/575/17137                                                         | 1230/534/15966                                                         | 538/0/5854                                                             | 667/0/11902                                                            | 379/0/7065                                                            |
| GOF                                     | 1.035                                                                  | 1.088                                                                  | 1.049                                                                  | 1.073                                                                  | 1.046                                                                 |
| $R_1, \omega R_2$ ( $I > 2 \sigma(I)$ ) | 0.0758, 0.1921                                                         | 0.0998, 0.2731                                                         | 0.0742, 0.1921                                                         | 0.0381, 0.0789                                                         | 0.0481, 0.1209                                                        |
| $R_1, \omega R_2$ (all data)            | 0.1365, 0.2522                                                         | 0.1181 0.2945                                                          | 0.1019, 0.2199                                                         | 0.0517, 0.0915                                                         | 0.0616, 0.1299                                                        |

$$R_1 = \frac{\sum |F_o| - |F_c|}{\sum |F_o|}, \omega R_2 = \left[ \frac{\sum [\omega(F_o^2 - F_c^2)^2]}{\sum [\omega(F_o^2)^2]} \right]^{1/2}.$$

**Table S2.** Selected Bond Lengths (Å) and Bond Angles (deg) for Compounds **1**, **2**, **4**, *trans*- $\text{Ru}^{\text{II}}(\text{meopy})_4(\text{CN})_2$  and  $[\text{CpFe}^{\text{III}}(\text{dppe})\text{Br}](\text{PF}_6)$

|           | <b>1</b> ·7H <sub>2</sub> O | <b>2</b> (2·CH <sub>3</sub> CN·0.5NH <sub>4</sub> PF <sub>6</sub> ) | <b>4</b> | <i>trans</i> - $\text{Ru}^{\text{II}}(\text{Meopy})_4(\text{CN})_2$ | $[\text{CpFe}^{\text{III}}(\text{dppe})\text{Br}](\text{PF}_6)$ |
|-----------|-----------------------------|---------------------------------------------------------------------|----------|---------------------------------------------------------------------|-----------------------------------------------------------------|
| Ru1-C1    | 1.997(7)                    | 2.048(7)                                                            | 2.069(5) | 2.055(3)                                                            | Fe1-C27 2.084(3)                                                |
| Ru1-C2    | 2.036(7)                    | 2.004(7)                                                            | 2.069(5) | 2.058(3)                                                            | Fe1-C28 2.127(3)                                                |
| Ru1-N3    | 2.098(6)                    | 2.097(6)                                                            | 2.146(4) | 2.097(2)                                                            | Fe1-C29 2.152(3)                                                |
| Ru1-N4    | 2.092(6)                    | 2.105(6)                                                            | 2.143(5) | 2.105(2)                                                            | Fe1-C30 2.155(3)                                                |
| Ru1-N5    | 2.091(6)                    | 2.095(6)                                                            | 2.146(4) | 2.101(2)                                                            | Fe1-C31 2.131(3)                                                |
| Ru1-N6    | 2.102(6)                    | 2.105(6)                                                            | 2.143(5) | 2.105(2)                                                            | Fe1-P1 2.2727(12)                                               |
| C1≡N1     | 1.185(8)                    | 1.174(9)                                                            | 1.168(7) | 1.160(4)                                                            | Fe1-P2 2.2823(10)                                               |
| C2≡N2     | 1.173(8)                    | 1.171(9)                                                            | 1.168(7) | 1.149(4)                                                            | Fe1-Br1 2.3649(9)                                               |
| Fe1-N1    | 1.896(6)                    | 1.914(6)                                                            | 1.958(5) |                                                                     | P1-Fe1-Br1 90.90(3)                                             |
| Fe2-N2    | 1.911(5)                    | 1.889(5)                                                            | 1.958(5) |                                                                     | P2-Fe1-Br1 95.99(3)                                             |
| Fe1-P1    | 2.239(2)                    | 2.204(2)                                                            | 2.212(3) |                                                                     | P1-Fe1-P2 82.91(3)                                              |
| Fe1-P2    | 2.251(2)                    | 2.217(2)                                                            | 2.212(3) |                                                                     |                                                                 |
| Fe2-P3    | 2.218(2)                    | 2.254(2)                                                            | 2.212(3) |                                                                     |                                                                 |
| Fe2-P4    | 2.224(2)                    | 2.265(2)                                                            | 2.212(3) |                                                                     |                                                                 |
| Fe1-C23   | 2.101(10)                   | 2.101(8)                                                            | 2.111(5) |                                                                     |                                                                 |
| Fe1-C24   | 2.114(10)                   | 2.097(8)                                                            | 2.090(6) |                                                                     |                                                                 |
| Fe1-C25   | 2.145(10)                   | 2.061(7)                                                            | 2.105(6) |                                                                     |                                                                 |
| Fe1-C26   | 2.096(9)                    | 2.080(7)                                                            | 2.122(6) |                                                                     |                                                                 |
| Fe1-C27   | 2.044(8)                    | 2.099(8)                                                            | 2.122(6) |                                                                     |                                                                 |
| Fe2-C54   | 2.101(8)                    | 2.118(7)                                                            | 2.111(5) |                                                                     |                                                                 |
| Fe2-C55   | 2.081(7)                    | 2.075(7)                                                            | 2.090(6) |                                                                     |                                                                 |
| Fe2-C56   | 2.053(8)                    | 2.088(7)                                                            | 2.105(6) |                                                                     |                                                                 |
| Fe2-C57   | 2.100(8)                    | 2.153(8)                                                            | 2.122(6) |                                                                     |                                                                 |
| Fe2-C58   | 2.102(8)                    | 2.161(7)                                                            | 2.122(6) |                                                                     |                                                                 |
| C1-Ru1-C2 | 177.7(3)                    | 178.2(3)                                                            | 180.0    | 178.79(11)                                                          |                                                                 |
| N1≡C1-Ru1 | 174.1(6)                    | 173.9(6)                                                            | 175.0(4) | 177.8(3)                                                            |                                                                 |
| N2≡C2-Ru1 | 179.3(6)                    | 174.8(6)                                                            | 175.0(4) | 178.4(3)                                                            |                                                                 |

|           |           |           |           |
|-----------|-----------|-----------|-----------|
| C1≡N1-Fe1 | 172.5(6)  | 172.3(6)  | 168.7(4)  |
| C2≡N2-Fe2 | 173.8(5)  | 174.8(6)  | 168.7(4)  |
| N1-Fe1-P1 | 89.68(18) | 90.93(18) | 93.03(14) |
| N1-Fe1-P2 | 93.49(19) | 88.41(18) | 87.87(13) |
| P1-Fe1-P2 | 84.83(8)  | 84.49(8)  | 84.89(8)  |
| N2-Fe2-P3 | 93.36(18) | 93.50(18) | 93.03(14) |
| N2-Fe2-P4 | 93.6(2)   | 89.50(18) | 87.87(13) |
| P3-Fe2-P4 | 84.34(8)  | 83.64(8)  | 84.89(8)  |
| Fe1...Ru1 | 5.052     | 5.110     | 5.155     |
| Fe2...Ru1 | 5.112     | 5.047     | 5.155     |
| Fe1...Fe2 | 10.142    | 10.153    | 10.311    |

**Table S3** Cyanide Stretching Frequencies, Electronic Absorption Spectra and Cyclic-Voltammetry Data for Compound **1-5** and Related Precursors.

| Compound                                                              | $\nu_{\text{CN}}$ (cm <sup>-1</sup> ) | $\nu_{\text{max}}$ , cm <sup>-1</sup> ( $\epsilon$ , dm <sup>3</sup> mol <sup>-1</sup> cm <sup>-1</sup> ) | $P(\text{V})/\text{CH}_3\text{CN}$ | $P(\text{V})/\text{CH}_2\text{Cl}_2$ |
|-----------------------------------------------------------------------|---------------------------------------|-----------------------------------------------------------------------------------------------------------|------------------------------------|--------------------------------------|
| <i>trans</i> -Ru <sup>II</sup> (py) <sub>4</sub> (CN) <sub>2</sub>    | 2058                                  | 40000 (20938 ), 27027 (28914 )                                                                            | 0.92                               |                                      |
| <i>trans</i> -Ru <sup>II</sup> (MeOpy) <sub>4</sub> (CN) <sub>2</sub> | 2056                                  | 27933 ( 17192 )                                                                                           | 0.54                               |                                      |
| [CpFe <sup>III</sup> (dppe)(CH <sub>3</sub> CN)]Br                    |                                       | 360(852), 458(634)                                                                                        |                                    |                                      |
| <b>1</b>                                                              | 2068                                  | 18657 (604)                                                                                               |                                    |                                      |
| <b>2</b>                                                              | 2089, 2020                            | 21505 (1297), 11641 (2357).                                                                               | 0.33, 0.45                         | 0.34, 0.47                           |
| <b>3</b>                                                              | 2023                                  | 465 (21505), 760 (13158)                                                                                  |                                    |                                      |
| <b>4</b>                                                              | 2061                                  | 21367 (876), 18939 (745)                                                                                  |                                    |                                      |
| <b>5</b>                                                              | 2084, 2010                            | 21505 (1211), 19084 (983), 9268 (2265)                                                                    | 0.17, 0.33                         | 0.30, 0.46                           |

**Figure S1.** Molecular structure of compound *trans*-Ru<sup>II</sup>(MeOpy)<sub>4</sub>(CN)<sub>2</sub> (hydrogen atoms have been removed for clarity).

**Figure S2** Molecular structure of [CpFe<sup>III</sup>(dppe)Br](PF<sub>6</sub>). (hydrogen atoms have been removed for clarity).

**Figure S3** Cyclic voltammogram of compound *trans*-Ru(py)<sub>4</sub>(CN)<sub>2</sub> in a 0.10 M acetonitrile solution of [Bu<sub>4</sub>N][PF<sub>6</sub>] at a scan rate of 100 mV s<sup>-1</sup>.

**Figure S4** Cyclic voltammogram of compound *trans*-Ru(meopy)<sub>4</sub>(CN)<sub>2</sub> in a 0.10 M acetonitrile solution of [Bu<sub>4</sub>N][PF<sub>6</sub>] at a scan rate of 100 mV s<sup>-1</sup>.

**Figure S5** Cyclic voltammogram of compound **1** in a 0.10 M dichloromethane solution of [Bu<sub>4</sub>N][PF<sub>6</sub>] at a scan rate of 100 mV s<sup>-1</sup>.

**Figure S6** Cyclic voltammogram of compound **4** in a 0.10 M dichloromethane solution of [Bu<sub>4</sub>N][PF<sub>6</sub>] at a scan rate of 100 mV s<sup>-1</sup>.

**Figure S7.** IR spectra of compound *trans*-Ru(py)<sub>4</sub>(CN)<sub>2</sub> in solid-state samples at room temperature. (KBr pellet)

**Figure S8.** IR spectra of compound *trans*-Ru(meopy)<sub>4</sub>(CN)<sub>2</sub> in solid-state samples at room

temperature. (KBr pellet)

**Figure S9.** Electronic absorption spectra of compounds *trans*-Ru(py)<sub>4</sub>(CN)<sub>2</sub> and *trans*-Ru(Meopy)<sub>4</sub>(CN)<sub>2</sub> in CH<sub>3</sub>CN solution at room temperature.
